# Supplementary material for: Cardiovascular Safety of Sodium Glucose Cotransporter 2 Inhibitors as Add-on to Metformin Monotherapy in Patients with Type 2 Diabetes Mellitus
Source: PubMed Central journal article supplement — Diabetes Metab J. 2020 Oct 30;45(4):505–14. doi: 10.4093/dmj.2020.0057 (PMC8369208; doi:10.4093/dmj.2020.0057), 2020-10-30
Supplement: dmj-2020-0057-suppl1.pdf [file dmj-2020-0057-suppl1.pdf]

**Supplementary Table 1.** Exposure time (days) of individual drugs in different drug classes

| Variable      | Cohort 1 |                   |
|---------------|----------|-------------------|
|               | Number   | Mean $\pm$ SD     |
| Cohort 1      |          |                   |
| SGLT2i        |          |                   |
| Dapagliflozin | 16,989   | 268.0 $\pm$ 214.8 |
| Empagliflozin | 2,362    | 77.3 $\pm$ 59.9   |
| Ipragliflozin | 2,337    | 127.6 $\pm$ 115.6 |
| DPP-4i        |          |                   |
| Alogliptin    | 3,242    | 290.0 $\pm$ 234.2 |
| Anagliptin    | 897      | 195.2 $\pm$ 125.1 |
| Evogliptin    | 697      | 133.7 $\pm$ 88.9  |
| Gemigliptin   | 3,759    | 248.5 $\pm$ 211.6 |
| Linagliptin   | 5,032    | 278.5 $\pm$ 230.5 |
| Saxagliptin   | 1,020    | 283.2 $\pm$ 225.6 |
| Sitagliptin   | 4,084    | 272.7 $\pm$ 229.4 |
| Teneligliptin | 1,838    | 203.6 $\pm$ 143.1 |
| Vildagliptin  | 1,119    | 267.2 $\pm$ 229.2 |
| Cohort 2      |          |                   |
| SGLT2i        |          |                   |
| Dapagliflozin | 15,872   | 272.1 $\pm$ 217.9 |
| Empagliflozin | 2,118    | 76.2 $\pm$ 59.5   |
| Ipragliflozin | 2,130    | 127.5 $\pm$ 117.1 |
| SU            |          |                   |
| Glibenclamide | 66       | 225.4 $\pm$ 239.0 |
| Gliclazide    | 1,819    | 206.4 $\pm$ 204.0 |
| Glimepiride   | 18,215   | 202.8 $\pm$ 202.2 |
| Glipizide     | 20       | 182.8 $\pm$ 147.9 |

SD, standard deviation; SGLT2i, sodium glucose cotransporter 2 inhibitor; DPP-4i, dipeptidyl peptidase-4 inhibitor; SU, sulfonylurea.
