# Supplementary material for: Cardiovascular Safety of Sodium Glucose Cotransporter 2 Inhibitors as Add-on to Metformin Monotherapy in Patients with Type 2 Diabetes Mellitus
Source: PubMed Central journal article supplement — Diabetes Metab J. 2020 Oct 30;45(4):505–14. doi: 10.4093/dmj.2020.0057 (PMC8369208; doi:10.4093/dmj.2020.0057), 2020-10-30
Supplement: dmj-2020-0057-suppl2.pdf [file dmj-2020-0057-suppl2.pdf]

**Supplementary Table 2.** Definitions of drug prescriptions and comorbidities based on ICD-10 codes, procedures, and surgery codes

|                                |                                                                                                  |
|--------------------------------|--------------------------------------------------------------------------------------------------|
| <b>Drug</b>                    |                                                                                                  |
| SGLT2i                         | A10BK01, A10BK02, A10BK03, A10BD15, A10BD16, A10BD20, A10BX                                      |
| SU                             | A10BB, A10BD02, A10BD04, A10BD06                                                                 |
| DPP-4i                         | A10BH, A10BD07, A10BD08, A10BD09, A10BD10, A10BD11, A10BD13, A10BD18, A10BD                      |
| Metformin                      | A10BA                                                                                            |
| Low dose acetyl salicylic acid | B01AC06                                                                                          |
| Statin                         | C10AA                                                                                            |
| ACE inhibitors                 | C09A, C09B                                                                                       |
| ARB                            | C09C, C09D (exclude C09DX04)                                                                     |
| Dihydropyridines               | C08C                                                                                             |
| Low ceiling diuretics          | C03A, C03B                                                                                       |
| Beta blockers                  | C07                                                                                              |
| Non-hydropyridines             | C08D                                                                                             |
| High ceiling diuretics         | C03C                                                                                             |
| Aldosterone antagonists        | C03DA                                                                                            |
| Warfarin                       | B01AA03                                                                                          |
| Receptor P2Y12 antagonists     | B01AC04, B01AC05, B01AC22, B01AC24                                                               |
| <b>Comorbidities</b>           |                                                                                                  |
| Myocardial infarction          | I21, I22                                                                                         |
| PCI with stent                 | M6551, M6552, M6561, M6562, M6563, M6564, M6565, M6566, M6567                                    |
| Unstable angina                | I20.0                                                                                            |
| Angina pectoris                | I20.1, I20.8, I20.9                                                                              |
| Heart failure                  | I50                                                                                              |
| Atrial fibrillation            | I48                                                                                              |
| Stroke                         | I60-I66                                                                                          |
| PAD <sup>a</sup>               | M6597, M6605, M6613, M6632, M6620, O0161~O0171, O1643-4, O1645~6, I70.2-3, I70.9, I73.1, I73.8-9 |
| CKD                            | N18                                                                                              |
| Diabetic neuropathy            | G99.0, G59.0, G63.2, E10.4, E11.4, E12.4, E13.4, E14.4                                           |
| Diabetic retinopathy           | H28.0, H35.8, H36.0, E10.3, E11.3, E12.3, E13.3, E14.3                                           |
| Diabetic nephropathy           | N08.3, E10.2, E11.2, E12.2, E13.2, E14.2                                                         |
| Severe hypoglycemia            | E10.0, E11.0, E12.0, E13.0, E14.0, E11.6A, E16.0-2                                               |
| Keto-/lactate acidosis         | E10.1, E11.1, E12.1, E13.1, E14.1, E87.2                                                         |
| Cancer                         | C00-C99                                                                                          |

ICD-10, International Classification of Disease, tenth revision; SGLT2i, sodium glucose cotransporter 2 inhibitor; SU, sulfonylurea; DPP-4i, dipeptidyl peptidase-4 inhibitor; ACE, angiotensin converting enzyme; ARB, angiotensin receptor block; PCI, percutaneous coronary intervention; PAD, peripheral arterial disease; CKD, chronic kidney disease.

<sup>a</sup>Refers to PLoS One 2014;9:e110650.
