# Supplementary material for: Cardiovascular Safety of Sodium Glucose Cotransporter 2 Inhibitors as Add-on to Metformin Monotherapy in Patients with Type 2 Diabetes Mellitus
Source: PubMed Central journal article supplement — Diabetes Metab J. 2020 Oct 30;45(4):505–14. doi: 10.4093/dmj.2020.0057 (PMC8369208; doi:10.4093/dmj.2020.0057), 2020-10-30
Supplement: dmj-2020-0057-suppl3.pdf [file dmj-2020-0057-suppl3.pdf]

**Supplementary Table 3.** Demographic data and baseline characteristics before propensity score matching

| Characteristic                   | Cohort 1             |                       |                            | Cohort 2             |                  |                            |
|----------------------------------|----------------------|-----------------------|----------------------------|----------------------|------------------|----------------------------|
|                                  | SGLT2i<br>(n=21,713) | DPP-4i<br>(n=104,224) | Standardized<br>difference | SGLT2i<br>(n=21,837) | SU<br>(n=66,463) | Standardized<br>difference |
| Age                              | 51.8±12.0            | 58.0±12.6             | 50.2                       | 51.8±12.0            | 58.0±13.1        | 49.2                       |
| Women                            | 9,650 (44.4)         | 42,232 (40.5)         | 7.9                        | 9,699 (44.4)         | 25,180 (37.9)    | 13.3                       |
| Index year                       |                      |                       |                            |                      |                  |                            |
| 2014                             | 1,975 (9.1)          | 13,229 (12.7)         | 11.6                       | 1,975 (9.0)          | 10,815 (16.3)    | 21.9                       |
| 2015                             | 7,902 (36.4)         | 44,694 (42.9)         | 13.3                       | 7,902 (36.2)         | 31,391 (47.2)    | 22.5                       |
| 2016                             | 11,836 (54.5)        | 46,301 (44.4)         | 20.3                       | 11,960 (54.8)        | 24,257 (36.5)    | 37.3                       |
| Comorbidities                    |                      |                       |                            |                      |                  |                            |
| Cardiovascular disease           | 4,442 (20.5)         | 23,884 (22.9)         | 6.0                        | 4,465 (20.4)         | 12,220 (18.4)    | 5.2                        |
| Myocardial infarction            | 432 (2.0)            | 2,190 (2.1)           | 0.8                        | 429 (2.0)            | 1,013 (1.5)      | 3.4                        |
| PCI with stent                   | 276 (1.3)            | 1,008 (1.0)           | 2.9                        | 276 (1.3)            | 321 (0.5)        | 8.4                        |
| Unstable angina                  | 658 (3.0)            | 3,244 (3.1)           | 0.5                        | 658 (3.0)            | 1,489 (2.2)      | 4.8                        |
| Angina pectoris                  | 2,509 (11.6)         | 12,151 (11.7)         | 0.3                        | 2,524 (11.6)         | 5,708 (8.6)      | 9.9                        |
| Heart failure                    | 1,033 (4.8)          | 4,945 (4.7)           | 0.1                        | 1,032 (4.7)          | 2,372 (3.6)      | 5.8                        |
| Atrial fibrillation              | 389 (1.8)            | 2,290 (2.2)           | 2.9                        | 384 (1.8)            | 1,058 (1.6)      | 1.3                        |
| Stroke                           | 1,452 (6.7)          | 10,301 (9.9)          | 11.6                       | 1,465 (6.7)          | 5,582 (8.4)      | 6.4                        |
| Peripheral artery disease        | 13 (0.1)             | 74 (0.1)              | 0.4                        | 13 (0.1)             | 43 (0.1)         | 0.2                        |
| Chronic kidney disease           | 165 (0.8)            | 1,131 (1.1)           | 3.4                        | 163 (0.7)            | 534 (0.8)        | 0.7                        |
| Diabetic neuropathy              | 1,975 (9.1)          | 11,386 (10.9)         | 6.1                        | 1,996 (9.1)          | 6,255 (9.4)      | 0.9                        |
| Diabetic retinopathy             | 2,886 (13.3)         | 15,310 (14.7)         | 4.0                        | 2,907 (13.3)         | 7,272 (10.9)     | 7.3                        |
| Diabetic nephropathy             | 2,738 (12.6)         | 10,951 (10.5)         | 6.6                        | 2,773 (12.7)         | 3,566 (5.4)      | 25.8                       |
| Severe hypoglycemia              | 241 (1.1)            | 1,221 (1.2)           | 0.6                        | 244 (1.1)            | 830 (1.2)        | 1.2                        |
| Keto-/lactate acidosis           | 78 (0.4)             | 344 (0)               | 0.5                        | 78 (0.4)             | 244 (0.4)        | 0.2                        |
| Cancer                           | 1,749 (8.1)          | 10,378 (10.0)         | 6.6                        | 1,761 (8.1)          | 5,255 (7.9)      | 0.6                        |
| Frailty (yes)                    | 364 (1.7)            | 3,326 (3.2)           | 9.8                        | 364 (1.7)            | 3,304 (5.0)      | 18.5                       |
| Drugs                            |                      |                       |                            |                      |                  |                            |
| Low dose acetylic salicylic acid | 3,764 (17.3)         | 21,677 (20.8)         | 8.8                        | 3,770 (17.3)         | 12,052 (18.1)    | 2.3                        |
| Statin therapy                   | 13,303 (61.3)        | 57,228 (54.9)         | 12.9                       | 13,387 (61.3)        | 25,761 (38.8)    | 46.3                       |
| ACE inhibitors                   | 461 (2.1)            | 2,356 (2.3)           | 0.9                        | 462 (2.1)            | 1,358 (2.0)      | 0.5                        |
| ARB                              | 9,247 (42.6)         | 41,366 (39.7)         | 5.9                        | 9,291 (42.5)         | 23,847 (35.9)    | 13.7                       |
| Dihydropyridines                 | 3,348 (15.4)         | 20,757 (19.9)         | 11.8                       | 3,367 (15.4)         | 14,790 (22.3)    | 17.5                       |
| Low ceiling diuretics            | 1,402 (6.5)          | 7,445 (7.1)           | 2.7                        | 1,404 (6.4)          | 5,205 (7.8)      | 5.5                        |
| Beta blockers                    | 3,212 (14.8)         | 15,454 (14.8)         | 0.1                        | 3,215 (14.7)         | 8,731 (13.1)     | 4.6                        |
| Non-hydropyridines               | 477 (2.2)            | 2,500 (2.4)           | 1.3                        | 477 (2.2)            | 1,055 (1.6)      | 4.4                        |
| High ceiling diuretics           | 678 (3.1)            | 4,726 (4.5)           | 7.4                        | 674 (3.1)            | 2,613 (3.9)      | 4.6                        |
| Aldosterone antagonists          | 328 (1.5)            | 2,098 (2.0)           | 3.8                        | 329 (1.5)            | 1,103 (1.7)      | 1.2                        |
| Warfarin                         | 126 (0.6)            | 926 (0.9)             | 3.6                        | 125 (0.6)            | 410 (0.6)        | 0.6                        |
| Receptor P2Y12 antagonists       | 1,223 (5.6)          | 7,829 (7.5)           | 7.6                        | 1,228 (5.6)          | 3,415 (5.1)      | 2.2                        |

Values are presented as mean ± standard deviation or number (%). Frailty was defined by at least one hospital admission of ≥3 consecutive days during preceding year before the index date.

SGLT2i, sodium glucose cotransporter 2 inhibitor; DPP-4i, dipeptidyl peptidase-4 inhibitor; SU, sulfonylurea; PCI, percutaneous coronary intervention; ACE, angiotensin converting enzyme; ARB, angiotensin receptor blocker.
