# Supplementary material for: Cardiovascular Safety of Sodium Glucose Cotransporter 2 Inhibitors as Add-on to Metformin Monotherapy in Patients with Type 2 Diabetes Mellitus
Source: PubMed Central journal article supplement — Diabetes Metab J. 2020 Oct 30;45(4):505–14. doi: 10.4093/dmj.2020.0057 (PMC8369208; doi:10.4093/dmj.2020.0057), 2020-10-30
Supplement: dmj-2020-0057-suppl4.pdf [file dmj-2020-0057-suppl4.pdf]

**Supplementary Table 4.** Hazard ratios for cardiovascular events in the propensity score-matched population

| Variable              | Cohort 1 (n=21,688 pairs) |        |                  | Cohort 2 (n=20,120 pairs) |      |                  |
|-----------------------|---------------------------|--------|------------------|---------------------------|------|------------------|
|                       | Event rate                |        | HR (95% CI)      | Event rate                |      | HR (95% CI)      |
|                       | SGLT2i                    | DPP-4i |                  | SGLT2i                    | SU   |                  |
| HHF                   | 0.57                      | 0.87   | 0.65 (0.49–0.86) | 0.59                      | 0.95 | 0.63 (0.47–0.84) |
| All-cause death       | 0.19                      | 0.30   | 0.63 (0.39–1.01) | 0.19                      | 0.43 | 0.45 (0.28–0.73) |
| HHF+All-cause death   | 0.72                      | 1.14   | 0.63 (0.49–0.80) | 0.74                      | 1.28 | 0.59 (0.45–0.76) |
| Myocardial infarction | 0.31                      | 0.26   | 1.15 (0.74–1.77) | 0.30                      | 0.39 | 0.78 (0.50–1.20) |
| Stroke                | 0.84                      | 0.84   | 0.98 (0.76–1.26) | 0.88                      | 1.45 | 0.62 (0.49–0.79) |
| Modified MACE         | 1.31                      | 1.35   | 0.95 (0.78–1.16) | 1.34                      | 2.17 | 0.63 (0.52–0.77) |

Above results were obtained by on-treatment analyses.

SGLT2i, sodium glucose cotransporter 2 inhibitor; DPP-4i, dipeptidyl peptidase-4 inhibitor; HR, hazard ratio; CI, confidence interval; SU, sulfonylurea; HHF, hospitalization for heart failure; MACE, modified major adverse cardiovascular event.
