# Supplementary material for: Cardiovascular Safety of Sodium Glucose Cotransporter 2 Inhibitors as Add-on to Metformin Monotherapy in Patients with Type 2 Diabetes Mellitus
Source: PubMed Central journal article supplement — Diabetes Metab J. 2020 Oct 30;45(4):505–14. doi: 10.4093/dmj.2020.0057 (PMC8369208; doi:10.4093/dmj.2020.0057), 2020-10-30
Supplement: dmj-2020-0057-suppl5.pdf [file dmj-2020-0057-suppl5.pdf]

**Supplementary Table 5.** Demographic data and baseline characteristics after propensity score matching in the patient subgroup with available health examination data

| Characteristic                   | Cohort 1            |                     |                            | Cohort 2            |                 |                            |
|----------------------------------|---------------------|---------------------|----------------------------|---------------------|-----------------|----------------------------|
|                                  | SGLT2i<br>(n=9,205) | DPP-4i<br>(n=9,205) | Standardized<br>difference | SGLT2i<br>(n=7,998) | SU<br>(n=7,998) | Standardized<br>difference |
| Age, yr                          | 52.3±10.5           | 52.2±11.1           | 0.7                        | 53.2±10.4           | 53.2±11.5       | 0.9                        |
| Women                            | 3,890 (42.3)        | 3,867 (42.0)        | 0.5                        | 3,271 (40.9)        | 3,196 (40.0)    | 1.9                        |
| Index year                       |                     |                     |                            |                     |                 |                            |
| 2014                             | 816 (8.9)           | 804 (8.7)           | 0.5                        | 788 (9.9)           | 796 (10.0)      | 0.3                        |
| 2015                             | 3,224 (35.0)        | 3,203 (34.8)        | 0.5                        | 2,974 (37.2)        | 2,979 (37.2)    | 0.1                        |
| 2016                             | 5,165 (56.1)        | 5,198 (56.5)        | 0.7                        | 4,236 (53.0)        | 4,223 (52.8)    | 0.3                        |
| Comorbidities                    |                     |                     |                            |                     |                 |                            |
| Cardiovascular disease           | 1,723 (18.7)        | 1,736 (18.9)        | 0.4                        | 1,442 (18.0)        | 1,396 (17.5)    | 1.5                        |
| Myocardial infarction            | 162 (1.8)           | 173 (1.9)           | 0.9                        | 123 (1.5)           | 125 (1.6)       | 0.2                        |
| PCI with stent                   | 102 (1.1)           | 116 (1.3)           | 1.4                        | 68 (0.9)            | 58 (0.7)        | 1.4                        |
| Unstable angina                  | 239 (2.6)           | 255 (2.8)           | 1.1                        | 209 (2.6)           | 192 (2.4)       | 1.4                        |
| Angina pectoris                  | 986 (10.7)          | 1,011 (11.0)        | 0.9                        | 797 (10.0)          | 814 (10.2)      | 0.7                        |
| Heart failure                    | 361 (3.9)           | 384 (4.2)           | 1.3                        | 292 (3.7)           | 278 (3.5)       | 0.9                        |
| Atrial fibrillation              | 137 (1.5)           | 144 (1.6)           | 0.6                        | 109 (1.4)           | 114 (1.4)       | 0.5                        |
| Stroke                           | 521 (5.7)           | 546 (5.9)           | 1.2                        | 465 (5.8)           | 453 (5.7)       | 0.6                        |
| Peripheral artery disease        | 6 (0.1)             | 8 (0.1)             | 0.8                        | 4 (0.1)             | 5 (0.1)         | 0.5                        |
| Chronic kidney disease           | 64 (0.7)            | 83 (0.9)            | 2.3                        | 50 (0.6)            | 52 (0.7)        | 0.3                        |
| Diabetic neuropathy              | 740 (8.0)           | 732 (8.0)           | 0.3                        | 634 (7.9)           | 639 (8.0)       | 0.2                        |
| Diabetic retinopathy             | 1,156 (12.6)        | 1,162 (12.6)        | 0.2                        | 957 (12.0)          | 939 (11.7)      | 0.7                        |
| Diabetic nephropathy             | 1,101 (12.0)        | 1,119 (12.2)        | 0.6                        | 738 (9.2)           | 747 (9.3)       | 0.4                        |
| Severe hypoglycemia              | 105 (1.1)           | 108 (1.2)           | 0.3                        | 90 (1.1)            | 76 (1.0)        | 1.7                        |
| Keto-/lactate acidosis           | 25 (0.3)            | 20 (0.2)            | 1.1                        | 23 (0.3)            | 22 (0.3)        | 0.2                        |
| Cancer                           | 711 (7.7)           | 735 (8.0)           | 1.0                        | 584 (7.3)           | 626 (7.8)       | 2.0                        |
| Frailty (yes)                    | 145 (1.6)           | 153 (1.7)           | 0.7                        | 96 (1.2)            | 96 (1.2)        | 0.0                        |
| Drugs                            |                     |                     |                            |                     |                 |                            |
| Low dose acetylic salicylic acid | 1,457 (15.8)        | 1,461 (15.9)        | 0.1                        | 1,281 (16.0)        | 1,276 (16.0)    | 0.2                        |
| Statin therapy                   | 5,807 (63.1)        | 5,857 (63.6)        | 1.1                        | 4,798 (60.0)        | 4,834 (60.4)    | 0.9                        |
| ACE inhibitors                   | 162 (1.8)           | 159 (1.7)           | 0.2                        | 140 (1.8)           | 138 (1.7)       | 0.2                        |
| ARB                              | 3,709 (40.3)        | 3,738 (40.6)        | 0.6                        | 3,120 (39.0)        | 3,101 (38.8)    | 0.5                        |
| Dihydropyridines                 | 1,284 (13.9)        | 1,285 (14.0)        | 0.0                        | 1,187 (14.8)        | 1,206 (15.1)    | 0.7                        |
| Low ceiling diuretics            | 528 (5.7)           | 519 (5.6)           | 0.4                        | 482 (6.0)           | 468 (5.9)       | 0.7                        |
| Beta blockers                    | 1,161 (12.6)        | 1,171 (12.7)        | 0.3                        | 971 (12.1)          | 936 (11.7)      | 1.4                        |
| Non-hydropyridines               | 193 (2.1)           | 210 (2.3)           | 1.3                        | 150 (1.9)           | 160 (2.0)       | 0.9                        |
| High ceiling diuretics           | 209 (2.3)           | 208 (2.3)           | 0.1                        | 181 (2.3)           | 156 (2.0)       | 2.2                        |
| Aldosterone antagonists          | 109 (1.2)           | 108 (1.2)           | 0.1                        | 88 (1.1)            | 87 (1.1)        | 0.1                        |
| Warfarin                         | 36 (0.4)            | 40 (0.4)            | 0.7                        | 32 (0.4)            | 34 (0.4)        | 0.4                        |
| Receptor P2Y12 antagonists       | 450 (4.9)           | 491 (5.3)           | 2.0                        | 362 (4.5)           | 372 (4.7)       | 0.6                        |

(Continued to the next page)

Supplementary Table 5. Continued

| Characteristic                     | Cohort 1            |                     |                            | Cohort 2            |                 |                            |
|------------------------------------|---------------------|---------------------|----------------------------|---------------------|-----------------|----------------------------|
|                                    | SGLT2i<br>(n=9,205) | DPP-4i<br>(n=9,205) | Standardized<br>difference | SGLT2i<br>(n=7,998) | SU<br>(n=7,998) | Standardized<br>difference |
| Result of examination              |                     |                     |                            |                     |                 |                            |
| Body mass index, kg/m <sup>2</sup> | 27.8±4.1            | 27.7±4.3            | 0.8                        | 27.2±3.8            | 27.2±4.0        | 1.1                        |
| Waist circumference, cm            | 90.3±9.9            | 90.3±10.1           | 0.5                        | 89.3±9.3            | 89.3±9.9        | 0.7                        |
| Systolic blood pressure, mm Hg     | 129.4±15.0          | 129.2±15.3          | 1.0                        | 129.2±14.9          | 129.1±15.3      | 0.8                        |
| Diastolic blood pressure, mm Hg    | 80.7±10.3           | 80.7±10.4           | 0.4                        | 80.5±10.2           | 80.4±10.4       | 1.2                        |
| Fasting glucose, mg/dL             | 161.6±53.8          | 162.3±52.9          | 1.4                        | 164.5±55.3          | 165.0±58.0      | 0.8                        |
| Total cholesterol, mg/dL           | 205.2±51.0          | 205.4±58.0          | 0.4                        | 206.2±51.5          | 206.4±47.1      | 0.4                        |
| HDL-C, mg/dL                       | 49.5±12.5           | 49.5±12.6           | 0.1                        | 49.7±12.4           | 49.5±12.8       | 1.8                        |
| LDL-C, mg/dL                       | 117.5±48.5          | 117.5±54.9          | 0.1                        | 118.4±49.5          | 118.7±47.4      | 0.6                        |
| Triglyceride, mg/dL                | 210.8±187.6         | 211.3±187.3         | 0.3                        | 209.9±185.9         | 211.4±181.4     | 0.8                        |
| Creatinine, mg/dL                  | 0.9±0.5             | 0.9±0.3             | 0.2                        | 0.9±0.5             | 0.9±0.5         | 0.8                        |
| eGFR, mL/min/1.73 m <sup>2</sup>   | 93.0±24.4           | 93.0±24.6           | 0.1                        | 92.5±24.6           | 92.8±25.4       | 1.3                        |
| Smoking status                     |                     |                     |                            |                     |                 |                            |
| Non-smoker                         | 4,911 (53.4)        | 4,861 (52.8)        | 1.1                        | 4,167 (52.1)        | 4,140 (51.8)    | 0.7                        |
| Former smoker                      | 1,927 (20.9)        | 1,955 (21.2)        | 0.7                        | 1,705 (21.3)        | 1,740 (21.8)    | 1.1                        |
| Current smoker                     | 2,367 (25.7)        | 2,389 (26.0)        | 0.5                        | 2,126 (26.6)        | 2,118 (26.5)    | 0.2                        |
| Alcohol intake                     |                     |                     |                            |                     |                 |                            |
| Abstinent                          | 8,586 (93.3)        | 8,586 (93.3)        | 0.0                        | 7,433 (92.9)        | 7,435 (93.0)    | 0.1                        |
| Low-medium                         | 389 (4.2)           | 400 (4.3)           | 0.6                        | 358 (4.5)           | 352 (4.4)       | 0.4                        |
| High                               | 230 (2.5)           | 219 (2.4)           | 0.8                        | 207 (2.6)           | 211 (2.6)       | 0.3                        |
| Physical activity                  |                     |                     |                            |                     |                 |                            |
| Low                                | 4,125 (44.8)        | 4,162 (45.2)        | 0.8                        | 3,641 (45.5)        | 3,638 (45.5)    | 0.1                        |
| Medium                             | 4,396 (47.8)        | 4,394 (47.7)        | 0.0                        | 3,753 (46.9)        | 3,757 (47.0)    | 0.1                        |
| High                               | 684 (7.4)           | 649 (7.1)           | 1.5                        | 604 (7.6)           | 603 (7.5)       | 0.0                        |

Values are presented as mean ± standard deviation or number (%). Frailty was defined by at least one hospital admission of ≥3 consecutive days during preceding year before the index date.

SGLT2i, sodium glucose cotransporter 2 inhibitor; DPP-4i, dipeptidyl peptidase-4 inhibitor; SU, sulfonylurea; PCI, percutaneous coronary intervention; ACE, angiotensin converting enzyme; ARB, angiotensin receptor blocker; HDL-C, high density lipoprotein cholesterol; LDL-C, low density lipoprotein cholesterol; eGFR, estimated glomerular filtration rate.
