# Supplementary material for: Cardiovascular Safety of Sodium Glucose Cotransporter 2 Inhibitors as Add-on to Metformin Monotherapy in Patients with Type 2 Diabetes Mellitus
Source: PubMed Central journal article supplement — Diabetes Metab J. 2020 Oct 30;45(4):505–14. doi: 10.4093/dmj.2020.0057 (PMC8369208; doi:10.4093/dmj.2020.0057), 2020-10-30
Supplement: dmj-2020-0057-suppl6.pdf [file dmj-2020-0057-suppl6.pdf]

**Supplementary Table 6.** Hazard ratios for cardiovascular events in the subgroup with available health examination data after propensity score matching

| Variable              | Cohort 1 ( <i>n</i> =9,205 pairs) |        |                  | Cohort 2 ( <i>n</i> =7,998 pairs) |      |                  |
|-----------------------|-----------------------------------|--------|------------------|-----------------------------------|------|------------------|
|                       | Event rate                        |        | HR (95% CI)      | Event rate                        |      | HR (95% CI)      |
|                       | SGLT2i                            | DPP-4i |                  | SGLT2i                            | SU   |                  |
| HHF                   | 0.61                              | 0.72   | 0.84 (0.59–1.21) | 0.62                              | 0.91 | 0.68 (0.48–0.97) |
| All-cause death       | 0.31                              | 0.29   | 1.06 (0.62–1.81) | 0.34                              | 0.37 | 0.92 (0.55–1.53) |
| HHF+All-cause death   | 0.84                              | 0.97   | 0.86 (0.63–1.17) | 0.88                              | 1.21 | 0.73 (0.54–0.99) |
| Myocardial infarction | 0.19                              | 0.24   | 0.83 (0.44–1.56) | 0.20                              | 0.40 | 0.52 (0.29–0.94) |
| Stroke                | 0.86                              | 0.86   | 0.99 (0.72–1.36) | 0.89                              | 0.87 | 1.02 (0.74–1.42) |
| modified MACE         | 1.26                              | 1.34   | 0.94 (0.73–1.21) | 1.33                              | 1.50 | 0.88 (0.68–1.14) |

Above results were obtained by intention to treatment analyses.

SGLT2i, sodium glucose cotransporter 2 inhibitor; DPP-4i, dipeptidyl peptidase-4 inhibitor; HR, hazard ratio; CI, confidence interval; SU, sulfonylurea; HHF, hospitalization for heart failure; MACE, modified major adverse cardiovascular event.
